# Supplementary material for: One-pot synthesis of fluorescent cap1 mRNAs using labelled trinucleotide m7G-cap analogs for real-time in vitro and in vivo mRNA tracking
Source: Royal Society of Chemistry journal article supplement (doi:10.1039/d6ra00979d), 2026-05-14
Supplement: d6ra00979d1.pdf [file d6ra00979d1.pdf]

## Supporting Information

### One-pot syntheses of fluorescent cap1 mRNAs via labeled trinucleotide m7G-Cap analogs for real-time *in vitro* and *in vivo* mRNA trackings

Chou Yang<sup>1,†</sup>, Chen Guo<sup>2,†</sup>, Yiqian Zhou<sup>2,†</sup>, Suyong Li<sup>2</sup>, Mengjie Li<sup>1</sup>, Yalin Xie<sup>2</sup>, Yanhui Liu<sup>2</sup>,  
Xinyu lu<sup>1</sup>, Lijun Zhang<sup>2</sup>, Guoheng Mo<sup>1</sup>, Wei Zhu<sup>1</sup>, Jinlin Hou<sup>1,\*</sup>, Jiancun Zhang<sup>2,\*</sup>

1. State Key Laboratory of Organ Failure Research, Guangdong Provincial Key  
Laboratory of Viral Hepatitis Research, Guangdong Institute of Liver Diseases,  
Department of Infectious Diseases and Hepatology Unit, Nanfang Hospital, Southern  
Medical University, Guangzhou, 510515, China.

2. Guangzhou Henovcom Bioscience Co., Ltd., Guangzhou, Guangdong 510700, China.

## Contents

|                                                                                                                                  |   |
|----------------------------------------------------------------------------------------------------------------------------------|---|
| S1. General Chemical synthese information.....                                                                                   | 3 |
| S2. General procedure for aminomethyl Cap analog <b>2</b> .....                                                                  | 3 |
| S3. General procedure for Cy3/Cy5/Cy7 cap analogs.....                                                                           | 4 |
| S4. Characterization data for Cy3 cap analog <b>8</b> .....                                                                      | 5 |
| S5. Characterization data for Cy5 cap analog <b>9</b> .....                                                                      | 6 |
| S6. Characterization data for Cy7 cap analog <b>10</b> .....                                                                     | 7 |
| S7. Characterization data for PEG5-FAM cap analog <b>11</b> .....                                                                | 7 |
| S8. Characterization data for C6-MANT cap analog <b>12</b> .....                                                                 | 8 |
| S9. The <sup>1</sup> H NMR and <sup>31</sup> P NMR spectra of cap analog <b>1, 2, 8, 9,</b><br><b>10, 11</b> and <b>12</b> ..... | 9 |

|                                                                                                                  |    |
|------------------------------------------------------------------------------------------------------------------|----|
| S10. LC-MS analysis of the capping efficiency with the synthesized cap analogs.....                              | 21 |
| S11. Transcript length, and template details of luciferase mRNA, eGPF mRNA and HBs <sub>183</sub> -TCR mRNA..... | 24 |
| S12. Characterization of LNP samples.....                                                                        | 27 |

## **S1. General Chemical syntheses information**

All chemicals and solvents were of laboratory grade as obtained from commercial suppliers and were used without further purification. All the nucleotides were purified by ion-exchange chromatography on LX-650 resins from Sunresin New Materials Co.Ltd. NMR spectra were recorded with a Bruker Avance III spectrometer at 500.13 MHz ( $^1\text{H}$  NMR) and 202.45 MHz ( $^{31}\text{P}$  NMR) or a Bruker Avance IV spectrometer at 400.18 MHz ( $^1\text{H}$  NMR) and 162.00 MHz ( $^{31}\text{P}$  NMR). The  $^1\text{H}$  NMR chemical shifts were calibrated to  $\text{D}_2\text{O}$  (4.79 ppm). The  $^{31}\text{P}$  NMR chemical shifts were reported directly without calibration. Mass spectra (MS) were recorded with an LTQ XL (Thermo Fisher Scientific) spectrometer.

The HPLC system consisted of an Agilent 1260 Infinity II high performance liquid chromatography, a VWD detector (DEACX34582) and a DNAPac PA200 column (8  $\mu\text{m}$ , 4mm \* 250 mm).

## **S2. General procedure for aminomethyl Cap analog 2**

The starting material N3 cap analog 1 was synthesized as described in US Pat., 12060385, 2024.

MS : m/z calcd for  $\text{C}_{33}\text{H}_{43}\text{N}_{18}\text{O}_{30}\text{P}_4^-$  [M-H] $^-$ : 1183.17, found : 1183.02.

$^1\text{H}$  NMR (500 MHz,  $\text{D}_2\text{O}$ )  $\delta$  9.09 (s, 1H), 8.50 (s, 1H), 8.23 (s, 1H),

7.97 (s, 1H), 6.08 (d,  $J = 5.0$  Hz, 1H), 5.80 - 5.79 (m, 2H), 4.95 - 4.92 (m, 1H), 4.67 (d,  $J = 4.8$  Hz, 1H), 4.52 (s, 1H), 4.49 - 4.46 (m, 2H), 4.43 (t,  $J = 4.7$  Hz, 1H), 4.34 - 4.31 (m, 3H), 4.26 - 4.23 (m, 1H), 4.21 - 4.16 (m, 2H), 4.15 - 4.13 (m, 1H), 4.00 (s, 3H), 3.64 - 3.60 (m, 1H), 3.55 - 3.52 (m, 1H), 3.47 (s, 3H), 2.64 - 2.58 (m, 1H);  $^{31}\text{P}$  NMR (202 MHz,  $\text{D}_2\text{O}$ )  $\delta$  -0.93 (s, 1H), -11.62 (m, 2P), -22.81 (t,  $J = 18.0$  Hz, 1P).

To a solution of cap analog **1** (175 mg, 0.148 mmol) in water (4 mL) and EtOH (1 mL) was added 10% Pd/C (20 mg). The reaction was stirred at room temperature for 6h under hydrogen atmosphere. The Pd/C was filtered off, and the filtrate was diluted with water and purified by ion-exchange chromatography on LX-650 resins (gradient elution from 0 – 1M TEAB) to give the TEA<sup>+</sup> salt form of compound **2** (160 mg, 0.138 mmol, 93%) as white solid after freeze-drying.

MS : m/z calcd for  $\text{C}_{33}\text{H}_{45}\text{N}_{16}\text{O}_{30}\text{P}_4^-$  [M-H]<sup>-</sup> : 1157.18, found : 1157.09.

$^1\text{H}$  NMR (500 MHz,  $\text{D}_2\text{O}$ )  $\delta$  8.38 (s, 1H), 8.05 (s, 1H), 7.87 (s, 1H), 6.03 (d,  $J = 5.9$  Hz, 1H), 5.87 (s, 1H), 5.77 (d,  $J = 5.9$  Hz, 1H), 4.94 (t,  $J = 5.6$  Hz, 1H), 4.87 - 4.84 (m, 1H), 4.50 – 4.45 (m, 3H), 4.40 - 4.35 (m, 2H), 4.31 - 4.26 (m, 3H), 4.22 - 4.15 (m, 3H), 4.01 (s, 3H), 3.39 (dd,  $J = 9.2, 13.5$  Hz, 1H), 3.31 (s, 3H), 3.23 (dd,  $J = 3.6, 13.2$  Hz, 1H), 3.18 (q,  $J = 7.4$  Hz, 14.3H), 2.97 - 2.92 (m, 1H), 1.26 (t,  $J =$

7.4 Hz, 22.1H);  $^{31}\text{P}$  NMR (202 MHz,  $\text{D}_2\text{O}$ )  $\delta$  -0.78 (s, 1H), -11.62 (d,  $J = 17.8$  Hz, 2P), -22.85 (t,  $J = 18.5$  Hz, 1P).

### **S3. General procedure for Cy3/Cy5/Cy7 cap analogs**

To a solution of Cy3/Cy5/Cy7 (1.0 eq) in DMF was added TEA (5 eq) and TSTU (1.5 eq). After stirring at room temperature for 15min to 2h, a solution of the aminomethyl Cap analog **2** (1.0 eq) and TEA (5 eq) in water was added. The reaction was stirred for 0.5h to 3.5h, diluted with water and purified by ion-exchange chromatography on LX-650 resins (gradient elution from 0 – 1M  $\text{NH}_4\text{HCO}_3$ ) to give the  $\text{NH}_4^+$  salt form of Cy3/Cy5/Cy7 cap analogs after freeze-drying.

### **S4. Characterization data for Cy3 cap analog **8****

Cy3 cap analog was prepared starting from the aminomethyl Cap analog **2** (50 mg) yielding 23 mg (30%) of the  $\text{NH}_4^+$  salt form as red solid after freeze-drying with HPLC purity 98%.

MS:  $m/z$  calcd for  $\text{C}_{64}\text{H}_{82}\text{N}_{18}\text{O}_{30}\text{P}_4\text{S}_2^-$  [M-H] $^-$ : 1769.38, found: 1769.45.  $^1\text{H}$ -NMR (500 MHz,  $\text{D}_2\text{O}$ )  $\delta$ : 8.37 (s, 1H), 8.32 (t,  $J = 13.3$  Hz, 1H), 7.94 (m, 2H), 7.85 – 7.82 (m, 3H), 7.77 (d,  $J = 8.3$  Hz, 1H), 7.28 (d,  $J = 8.3$  Hz, 1H), 7.16 (d,  $J = 8.4$  Hz, 1H), 6.17 (d,  $J = 13.3$  Hz, 1H), 6.08 (d,  $J = 13.3$  Hz, 1H), 5.91 (d,  $J = 6.0$  Hz, 1H), 5.87 (s, 1H), 5.77 (d,  $J = 5.0$  Hz, 1H), 4.93 (m, 1H), 4.65 (m, 1H), 4.57 (d,  $J$

= 4.2 Hz, 1H), 4.48 – 4.45 (m, 3H), 4.38 (s, 1H), 4.29 – 4.25 (m, 4H), 4.15 (m, 3H), 3.98 (m, 2H), 3.93 (m, 3H), 3.82 – 3.80 (m, 2H), 3.49 – 3.44 (m, 1H), 3.31 (s, 3H), 3.27 – 3.25 (m, 1H), 2.56 (m, 1H), 2.27 (m, 2H), 1.63 – 1.54 (m, 15H), 1.32 – 1.23 (m, 6H). <sup>31</sup>P-NMR (202 MHz, D<sub>2</sub>O) δ: -1.22 (s, 1P), -10.69 (m, 1P), -11.46 (m, 1P), -21.89(m, 1P).

### **S5. Characterization data for Cy5 cap analog 9**

Cy5 cap analog was prepared starting from the aminomethyl Cap analog **2** (100 mg) yielding 33 mg (21%) of the NH<sub>4</sub><sup>+</sup> salt form as blue solid after freeze-drying with HPLC purity 98%.

MS: m/z calcd for C<sub>66</sub>H<sub>84</sub>N<sub>18</sub>O<sub>30</sub>P<sub>4</sub>S<sub>2</sub><sup>-</sup> [M-H]<sup>-</sup>: 1795.39, found: 1795.12. <sup>1</sup>H-NMR (500 MHz, D<sub>2</sub>O) δ: 9.18 (s, 1H), 8.63 (s, 1H), 8.24 (s, 1H), 8.03 (s, 1H), 7.97 – 7.89 (m, 2H), 7.83 - 7.76 (m, 4H), 7.28 (d, *J* = 7.5 Hz, 1H), 7.22 (d, *J* = 8.0 Hz, 1H), 6.40 (t, *J* = 12.0 Hz, 1H), 6.21 (d, *J* = 13.5 Hz, 1H), 6.08 (s, 2H), 5.89 (s, 1H), 5.77 (s, 1H), 4.97 (s, 1H), 4.76 – 4.75 (m, 1H), 4.58 (s, 1H), 4.52 - 4.79 (m, 4H), 4.34 - 4.30 (m, 4H), 4.19 (s, 3H), 4.02 (m, 5H), 3.91 (s, 2H), 3.52 – 3.50 (m, 1H), 3.43 (s, 3H), 3.37 - 3.35 (m, 1H), 2.72 (m, 1H), 2.30 (s, 2H), 1.68 – 1.58 (m, 15H), 1.33 – 1.29 (m, 6H). <sup>31</sup>P-NMR (202 MHz, D<sub>2</sub>O) δ: -0.93 (s, 1P), -11.46 (d, *J* = 15.9 Hz, 1P), -11.64 (d, *J* = 18.3 Hz, 1P), -22.71 (t, 1P).

## S6. Characterization data for Cy7 cap analog 10

Cy7 cap analog was prepared starting from the aminomethyl Cap analog **2** (135 mg) yielding 50 mg (23%) of the NH<sub>4</sub><sup>+</sup> salt form as blue-green solid after freeze-drying with HPLC purity 95%.

MS: m/z calcd for C<sub>68</sub>H<sub>86</sub>N<sub>18</sub>O<sub>30</sub>P<sub>4</sub>S<sub>2</sub><sup>-</sup> [M-H]<sup>-</sup>: 1821.41, found: 1822.20. <sup>1</sup>H-NMR (400 MHz, D<sub>2</sub>O) δ: 9.05 (s, 1H), 8.42 (s, 1H), 8.00 (s, 1H), 7.86 (s, 1H), 7.74 – 7.44 (m, 6H), 7.18 – 7.13 (m, 2H), 6.99 (d, *J* = 8.5 Hz, 1H), 6.13 (t, *J* = 12.6 Hz, 1H), 6.06 – 6.00 (m, 2H), 5.92 (d, *J* = 5.9 Hz, 1H), 5.82 (s, 1H), 5.77 (d, *J* = 13.8 Hz, 1H), 5.68 (d, *J* = 5.8 Hz, 1H), 4.88 (s, 1H), 4.68 – 4.63 (m, 1H), 4.54 (d, *J* = 3.7 Hz, 1H), 4.41 - 4.37 (m, 4H), 4.31 – 4.04 (m, 7H), 3.95 – 3.93 (m, 2H), 3.88 (s, 3H), 3.71 (s, 2H), 3.49 (dd, *J* = 13.4, 9.9 Hz, 1H), 3.29 (s, 3H), 3.23 (d, *J* = 9.1 Hz, 1H), 2.63 (s, 1H), 2.21 (s, 2H), 1.61 – 1.35 (m, 15H), 1.29 – 1.17 (m, 6H). <sup>31</sup>P NMR (162 MHz, D<sub>2</sub>O) δ - 0.91 (s, 1P), -11.32 - -11.60 (m, 2P), -22.76 (t, 1P).

## S7. Characterization data for PEG5-FAM cap analog 11

PEG5-FAM was synthesis by condensation of FAM and amino-PEG4-acetic acid. The PEG5-FAM cap analog was prepared starting from the aminomethyl Cap analog **2** (70 mg) according to the procedure as Cy cap analogs using HATU instead of TSTU, yielding 10 mg (9%) of the NH<sub>4</sub><sup>+</sup> salt form as yellow solid after

freeze-drying with HPLC purity 94%.

MS: m/z calcd for  $C_{64}H_{75}N_{17}O_{34}P_4^-$  [M-H]<sup>-</sup>: 1748.35, found: 1748.96.

<sup>1</sup>H-NMR (500 MHz, D<sub>2</sub>O) δ: 9.02 (s, 1H), 8.33 (s, 1H), 8.29 (s, 1H), 8.02 (d, *J* = 7.2 Hz, 1H), 7.98 (s, 1H), 7.87 (s, 1H), 7.41 (d, *J* = 7.0 Hz, 1H), 7.06 (d, *J* = 8.6 Hz, 1H), 7.01 (d, *J* = 8.5 Hz, 1H), 6.62 (d, *J* = 8.6 Hz, 1H), 6.57 – 6.55 (m, 3H), 5.84 (s, 1H), 5.75 (d, *J* = 4.6 Hz, 1H), 5.72 (s, 1H), 4.89 – 4.82 (m, 2H), 4.68 (s, 1H), 4.52 (s, 1H), 4.46 (m, 3H), 4.36 (s, 1H), 4.31 - 4.24 (m, 4H), 4.17 (m, 3H), 4.01 (s, 3H), 3.97 (d, *J* = 15.5 Hz, 1H), 3.87 (d, *J* = 16.3 Hz, 1H), 3.79 (m, 2H), 3.72 (m, 2H), 3.68 (m, 4H), 3.60 – 3.51 (m, 8H), 3.43 (s, 3H), 3.23 (d, *J* = 12.3 Hz, 1H), 2.58 (m, 1H). <sup>31</sup>P-NMR (202 MHz, D<sub>2</sub>O) δ: -0.99 (s, 1P), -11.27 – -11.94 (m, 2P), -22.58 – -23.22 (m, 1P).

## **S8. Characterization data for C6-MANT cap analog 12**

C6-MANT was synthesis by condensation of MANT and 6-aminocaproic acid. To a solution of C6-MANT (36 mg, 0.14mmol) in DMF (1 mL) was added NHS (18 mg, 0.15 mmol) and EDCI (39 mg, 0.2 mmol). After stirring at room temperature for 1h, a solution of the aminomethyl Cap analog **2** (50 mg, 0.034 mmol) in water (0.8 mL) was added. The reaction was stirred for 0.5h, diluted with water and purified by ion-exchange chromatography on LX-650 resins (gradient elution from 0 – 1M NH<sub>4</sub>HCO<sub>3</sub>) to give the NH<sub>4</sub><sup>+</sup> salt form

of C6-MANT cap analog (15 mg, 0.011 mmol, 31%) as white solid after freeze-drying with HPLC purity 99%.

MS: m/z calcd for  $C_{47}H_{64}N_{18}O_{25}P_4^-$  [M-H]<sup>-</sup>: 1403.32, found: 1403.18.

<sup>1</sup>H-NMR (500 MHz, D<sub>2</sub>O) δ: 9.06 (s, 1H), 8.44 (s, 1H), 8.14 (s, 1H), 7.92 (s, 1H), 7.32 (t, *J* = 7.5 Hz, 1H), 7.27 (d, *J* = 8.0 Hz, 1H), 6.83 (d, *J* = 8.0 Hz, 1H), 6.75 (t, *J* = 7.0 Hz, 1H), 6.02 (d, *J* = 5.5 Hz, 1H), 5.81 (s, 1H), 5.76 (d, *J* = 6.0 Hz, 1H), 4.91 (s, 1H), 4.58 (d, *J* = 3.5 Hz, 1H), 4.49 – 4.41 (m, 4H), 4.34 (s, 1H), 4.29 – 4.21 (m, 3H), 4.18 (m, 2H), 4.14 – 4.12 (m, 1H), 3.93 (s, 3H), 3.52 (dd, *J* = 13.5, 9.5 Hz, 1H), 3.41 (s, 3H), 3.22 -3.16 (m, 3H), 2.77 (s, 3H), 2.64 (m, 1H), 2.24 (t, *J* = 7.0 Hz, 2H), 1.59 – 1.53 (m, 2H), 1.50 -1.45 (m, 2H), 1.28 -1.22 (m, 2H). <sup>31</sup>P-NMR (202 MHz, D<sub>2</sub>O) δ: -0.98 (s, 1P), -11.18 – -11.84 (m, 1P), -22.43 – -23.16 (m, 1P).

## **S9. The <sup>1</sup>H NMR and <sup>31</sup>P NMR spectra of cap analog 1, 8, 9, 10, 11 and 12**

### **1. cap analog 1**

<sup>1</sup>H NMR (500 MHz, D<sub>2</sub>O) of N3 cap analog 1







## HPLC of Cy3 cap analog 8

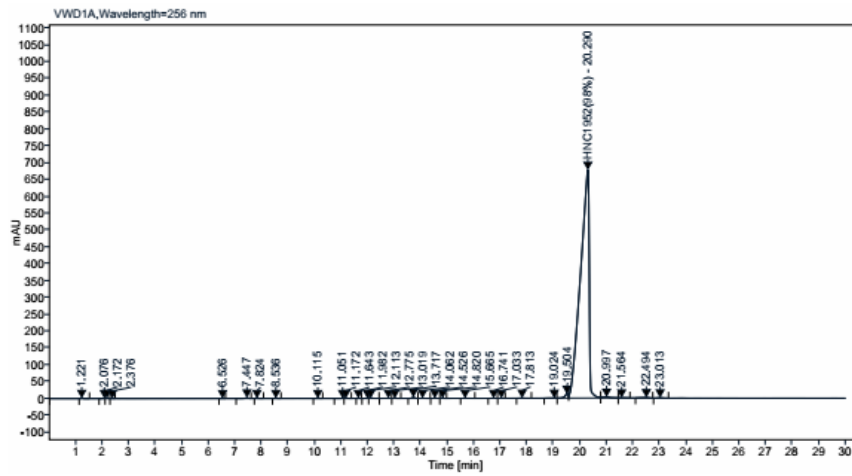

## 4. Cy5 cap analog 9

<sup>1</sup>H NMR (500 MHz, D<sub>2</sub>O) of Cy5 cap analog 9

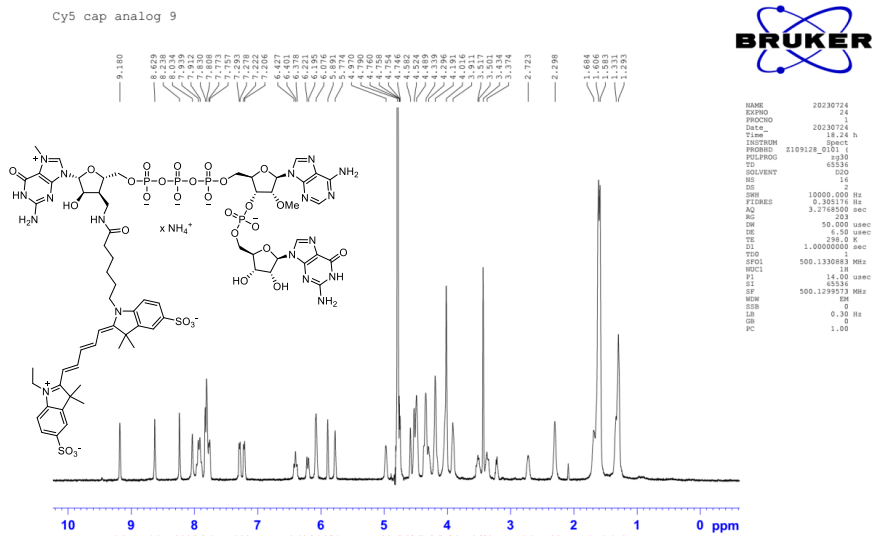

<sup>31</sup>P NMR (202 MHz, D<sub>2</sub>O) of Cy5 cap analog 9

Cy5 cap analog 9

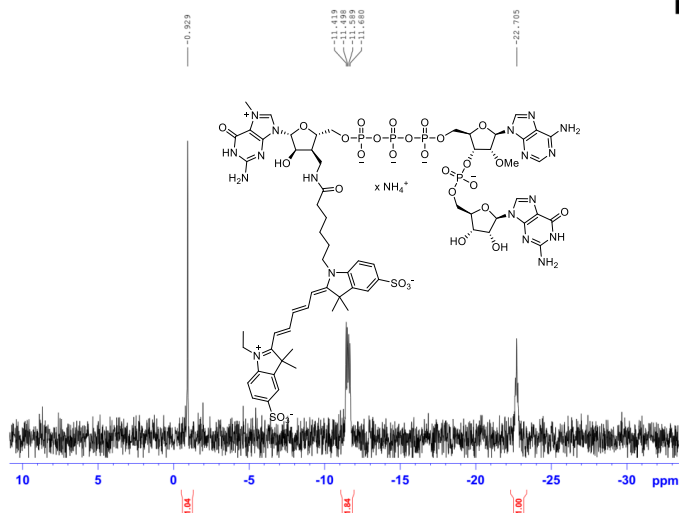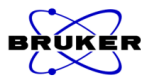

```

NAME      20230724
EXPNO     25
PROCNO    1
Date_     20230724
Time      16:26 h
INSTRUM   spect
PROBHD    z109128_0101 (
PULPROG   zgpg30
TD         65536
SOLVENT   DMSO
DS         16
DE         4
SWH        81521.742 Hz
F2RES      2.487846 Hz
AQ         0.4020041 sec
RG         253
SI         1.133 sec/c
SF         61.50 usec
DE         302.0
D1         2.0000000 sec
SLS        0.0300000 sec
TD0        202.4442121 MHz
WDW01      310
SI         81.500 usec
SF         327.88
CF         202.4543350 MHz
NS         804
DSB        0
LB         1.00 Hz
GB         0
PC         1.40
    
```

## MS of Cy5 cap analog 9

F: ITMS - c ESI Full ms [100.00-2000.00]

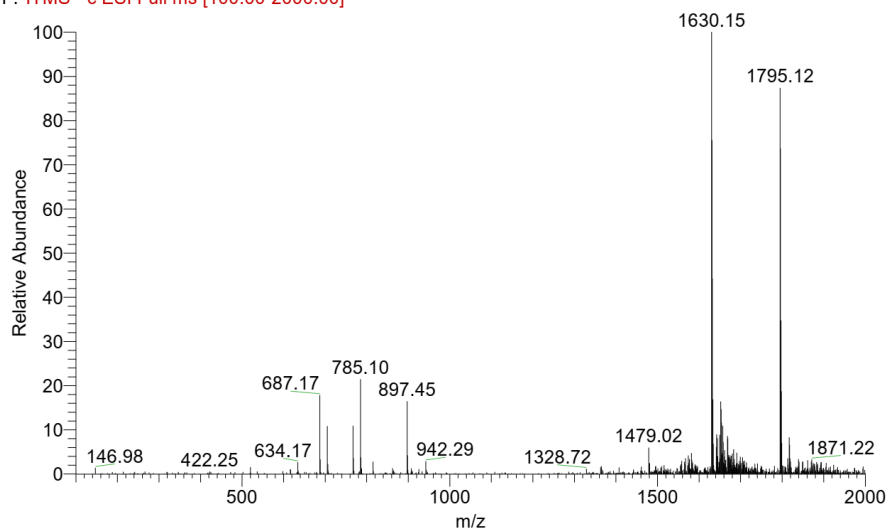

## HPLC of Cy5 cap analog 9

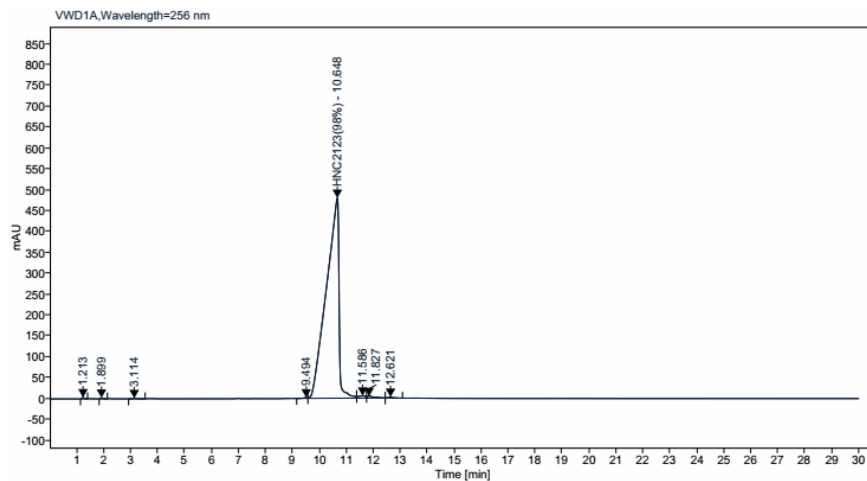

## 5. Cy7 cap analog 10

<sup>1</sup>H NMR (400 MHz, D<sub>2</sub>O) of Cy7 cap analog 10

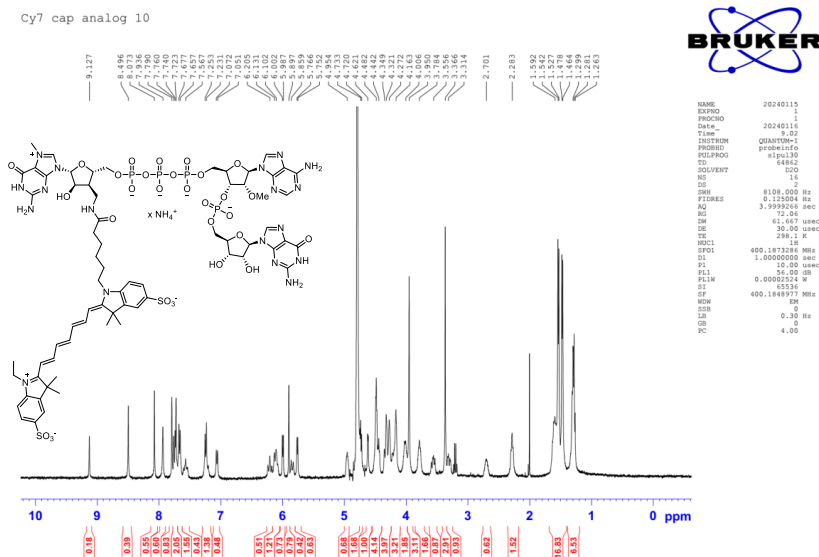

<sup>31</sup>P NMR (162 MHz, D<sub>2</sub>O) of Cy7 cap analog 10

Cy7 cap analog 10

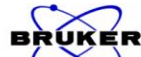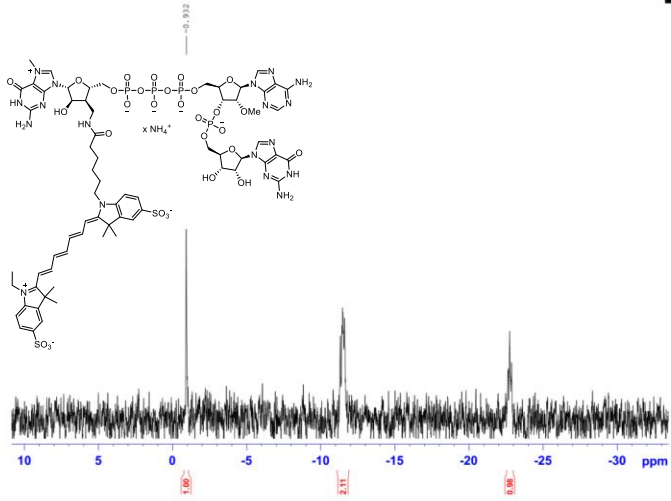

```

NAME      20240113
EXPNO    1
PROCNO   1
Date_    20240116
Time     12:14
INSTRUM  QNP400M
PROBHD   QNP400M
PULPROG  zgpg30
TD        65536
SOLVENT  D2O
NS        32
DS        4
SWH       6371.000 Hz
F2DRKE   0.000000 Hz
AQ        1.0000439 sec
RG        327.14
AQ        1.533 sec
DE        30.000000 Hz
TE        298.15 K
NUC1      15N
NUC2      13C
AQ1       141.2897281 sec
DI        2.00000000 sec
F1        12.00000000 MHz
P1        0.00000000 sec
P11       51.00000000 sec
DI        0.00000000 sec
P11       0.00000000 sec
TE        298.15 K
SOLVENT  D2O
NS        32
DS        4
SWH       6371.000 Hz
F2DRKE   0.000000 Hz
AQ        1.0000439 sec
RG        327.14
AQ        1.533 sec
DE        30.000000 Hz
TE        298.15 K

```

### MS of Cy7 cap analog 10

F: ITMS - c ESI Full ms [100.00-2000.00]

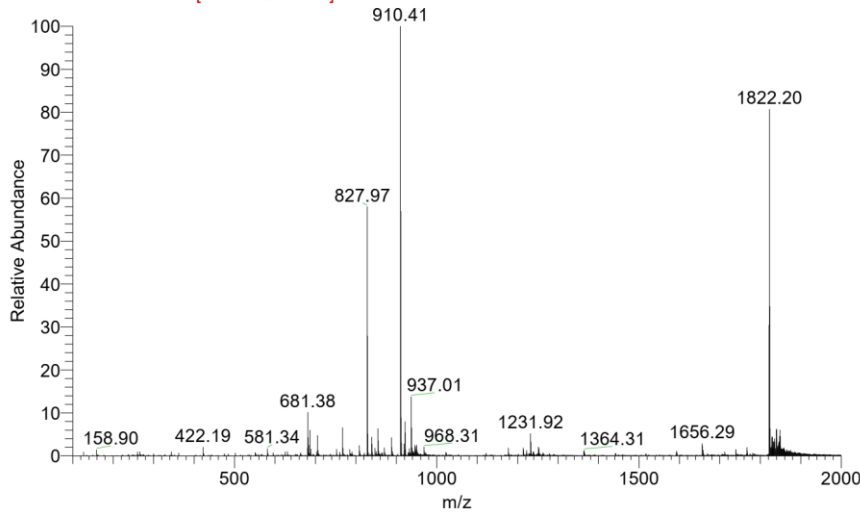

### HPLC of Cy7 cap analog 10

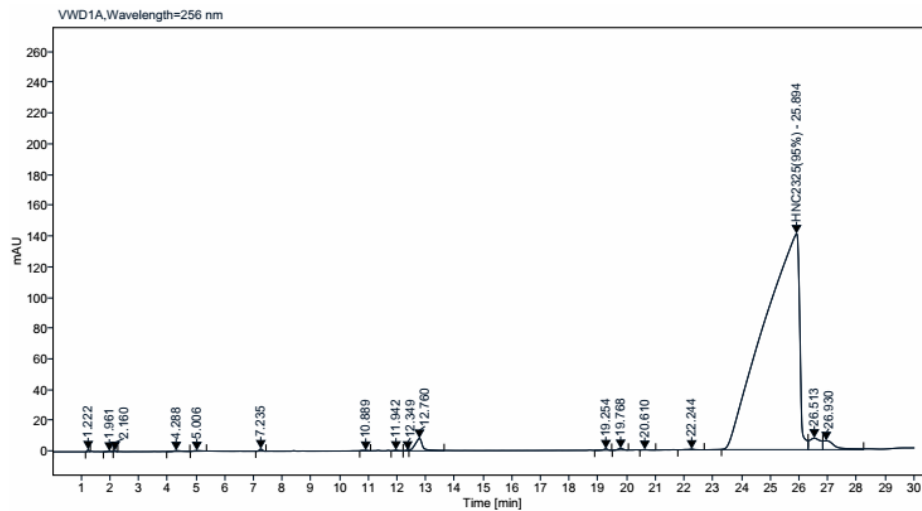

## 6. PEG5-FAM cap analog 11

<sup>1</sup>H NMR (500 MHz, D<sub>2</sub>O) of PEG5-FAM cap analog 11

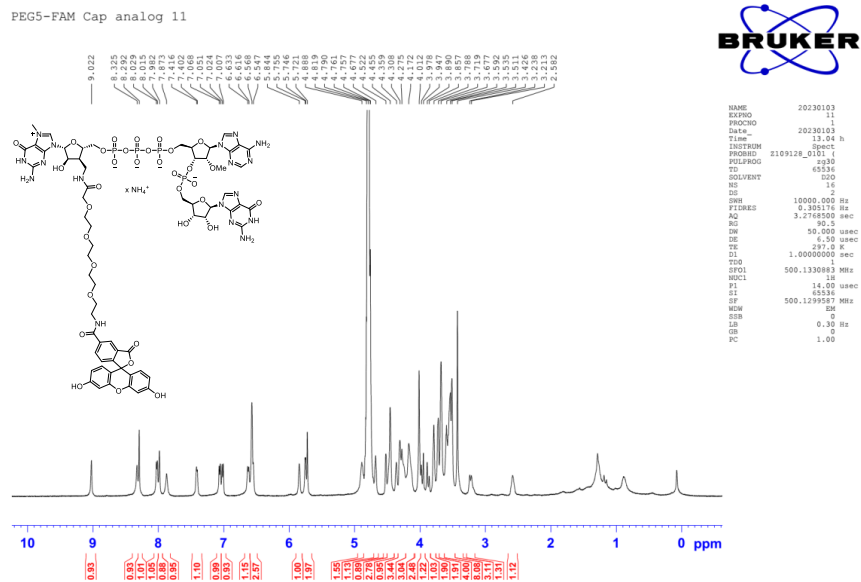

<sup>31</sup>P NMR (202 MHz, D<sub>2</sub>O) of PEG5-FAM cap analog 11

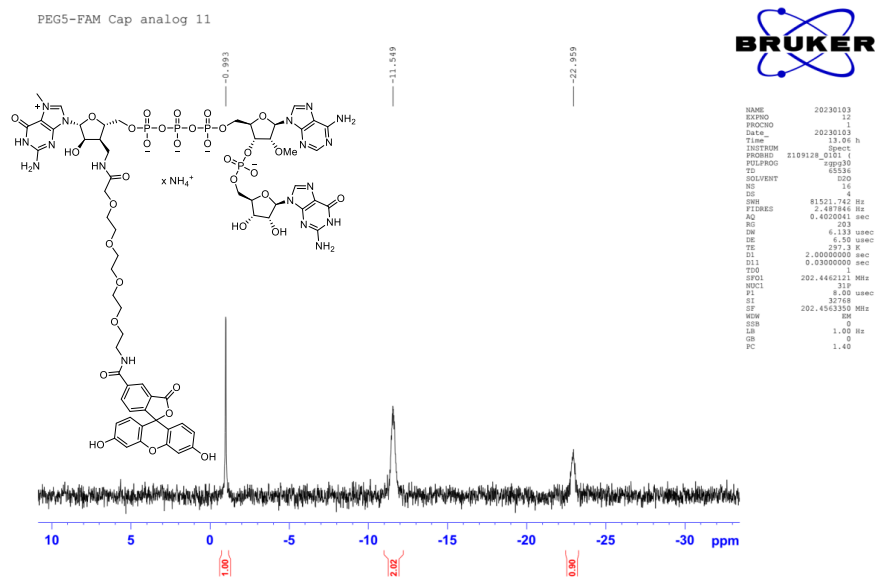

MS of PEG5-FAM cap analog 11

F: ITMS - c ESI Full ms [100.00-2000.00]

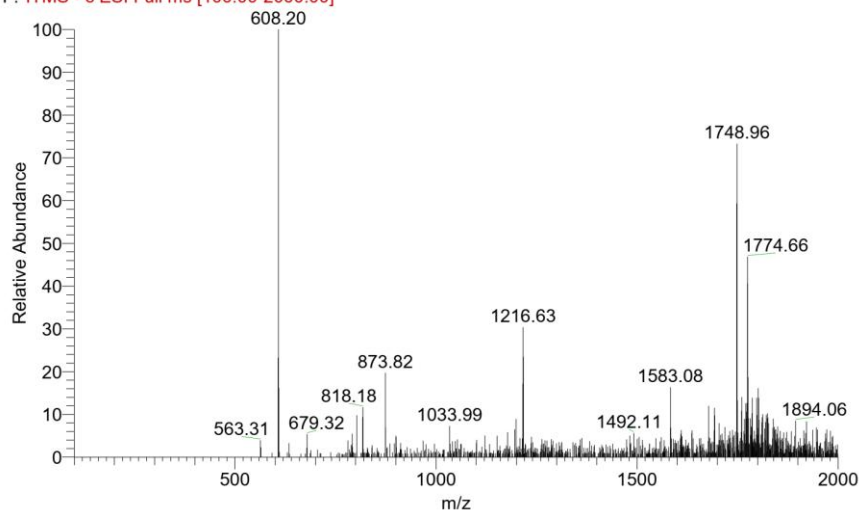

## HPLC of PEG5-FAM cap analog 11

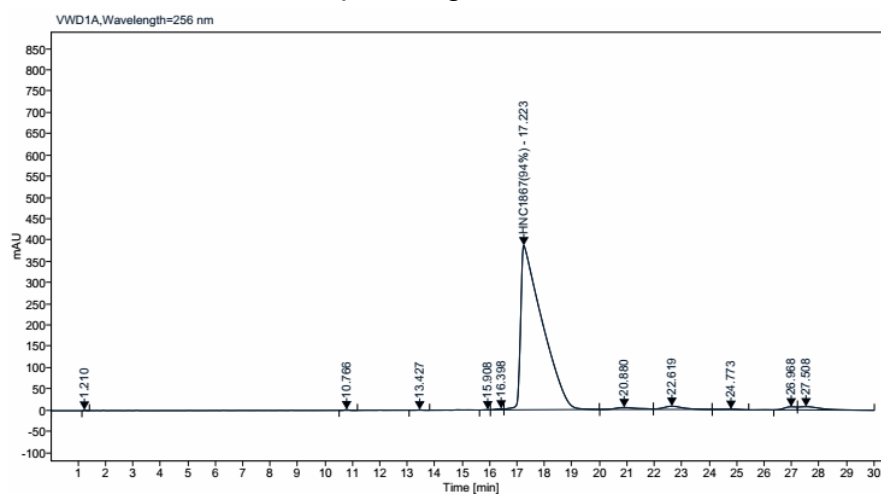

## 7. C6-MANT cap analog 12

$^1\text{H}$  NMR (500 MHz,  $\text{D}_2\text{O}$ ) of C6-MANT cap analog 12



## HPLC of C6-MANT cap analog 12

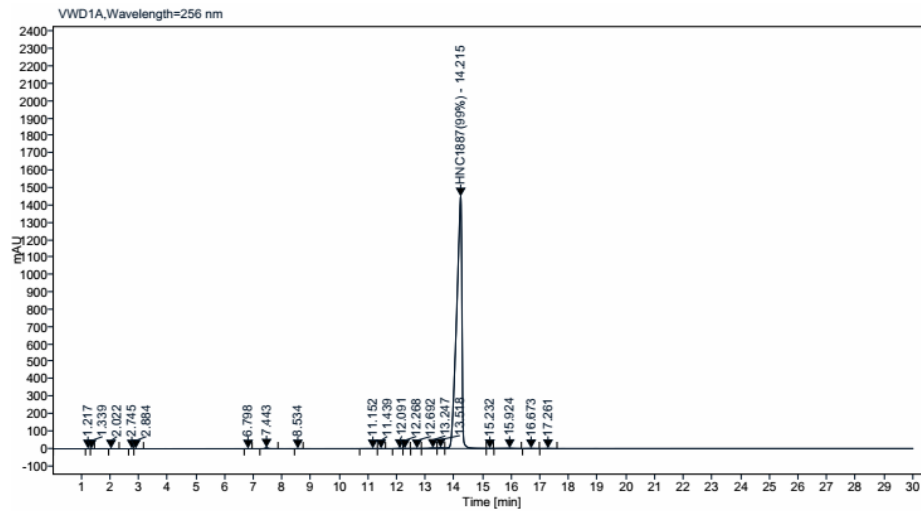

## S10. LC-MS analysis of the capping efficiency with the synthesized cap analogs.

Capping efficiency = (Abundance of all capped fragments) / (Abundance of all identified fragments) × 100%

The abundance of each fragment can be calculated using either 'relative abundance' or 'fractional abundance'.

## 8. LZCap AG (3' Acm)

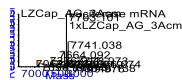

| Level     | Sequence Name   | Modification                  | Monoisotopic Mass | Theoretical Mass (Da) | Matched Mass Error (ppm) | Average Mass | Sum Intensity | Relative Abundance | Fractional Abundance |
|-----------|-----------------|-------------------------------|-------------------|-----------------------|--------------------------|--------------|---------------|--------------------|----------------------|
| Δ         | (Nonblank)      | Δ                             |                   |                       |                          |              |               |                    |                      |
| Component | Luciferase mRNA | 1xLZCap_AG_3Acm               | 7703.101          | 7703.090              | 1.4                      | 7706.70      | 3.37E+07      | 100.00             | 33.04                |
| Component | Luciferase mRNA | 2x3Truncation,1xLZCap_AG_3Acm | 7053.021          | 7053.001              | 2.7                      | 7056.32      | 3.15E+06      | 9.32               | 3.08                 |
| Component | Luciferase mRNA | 1x3Truncation,1xLZCap_AG_3Acm | 7358.052          | 7358.043              | 1.2                      | 7361.49      | 2.82E+06      | 8.35               | 2.76                 |
| Component | Luciferase mRNA | 1xDiphos                      | 7274.966          | 7274.970              | 0.6                      | 7278.37      | 9.38E+05      | 2.78               | 0.92                 |

Capping efficiency

$$=(100+9.32+8.35)/(100+9.32+8.35+2.78)*100\%=98\%$$

## 9. Cleancap AG (3' OMe)

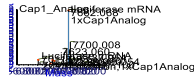

| Level     | Sequence Name   | Modification                 | Monoisotopic Mass | Theoretical Mass (Da) | Matched Mass Error (ppm) | Average Mass | Sum Intensity | Relative Abundance | Fractional Abundance |
|-----------|-----------------|------------------------------|-------------------|-----------------------|--------------------------|--------------|---------------|--------------------|----------------------|
| Component | Luciferase mRNA | 1xCap 1Analog                | 7662.068          | 7662.064              | 0.5                      | 7.665.85     | 3.28E+07      | 100.00             | 32.89                |
| Component | Luciferase mRNA | 2x3-Truncation, 1xCap 1An... | 7011.983          | 7011.975              | 1.1                      | 7.015.26     | 3.13E+06      | 9.56               | 3.13                 |
| Component | Luciferase mRNA | 1x3-Truncation, 1xCap 1An... | 7316.997          | 7317.017              | 2.8                      | 7.320.42     | 3.04E+06      | 9.28               | 3.03                 |
| Component | Luciferase mRNA | 1xTriphos                    | 7354.917          | 7354.936              | 2.6                      | 7.358.35     | 2.53E+06      | 7.73               | 2.53                 |
| Component | Luciferase mRNA | 1xDiphos                     | 7274.956          | 7274.970              | 1.9                      | 7.278.36     | 7.66E+05      | 2.34               | 0.76                 |

Capping efficiency

$$=(100+9.56+9.28)/(100+9.56+9.28+7.73+2.34)*100\%=92\%$$

## 10. LZCap AG (3'Ma-Cy3)

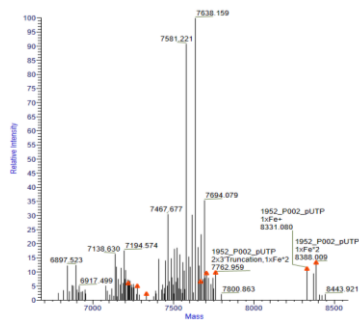

| Level     | Sequence Name  | Modification           | Monoisotopic Mass | Theoretical Mass (Da) | Matched Mass Error (ppm) | Average Mass | Sum Intensity | Relative Abundance | Fractional Abundance |
|-----------|----------------|------------------------|-------------------|-----------------------|--------------------------|--------------|---------------|--------------------|----------------------|
| Component | 1952_P002_pUTP | 1xFe+2                 | 8388.009          | 8388.171              | 19.4                     | 8.393.29     | 9.48E+04      | 13.61              | 1.42                 |
| Component | 1952_P002_pUTP | 1xFe+                  | 8331.080          | 8331.228              | 17.8                     | 8.336.32     | 7.92E+04      | 11.37              | 1.19                 |
| Component | 1952_P002_pUTP | 2x3-Truncation, 1xFe+2 | 7762.959          | 7763.889              | 16.8                     | 7.767.80     | 7.05E+04      | 10.10              | 1.06                 |
| Component | 1952_P002_pUTP | 2x3-Truncation, 1xFe   | 7707.085          | 7707.154              | 8.9                      | 7.711.90     | 6.83E+04      | 9.81               | 1.03                 |
| Component | 1952_P002_pUTP | 2x3-Truncation, 1xNH4+ | 7669.128          | 7669.253              | 16.3                     | 7.673.92     | 4.75E+04      | 6.83               | 0.71                 |
| Component | P1_P002_pUTP   | 1xMg+                  | 7222.151          | 7222.013              | 19.0                     | 7.226.68     | 4.36E+04      | 6.26               | 0.65                 |
| Component | P2_P002_pUTP   | 1xH                    | 7279.101          | 7279.003              | 13.5                     | 7.283.66     | 3.62E+04      | 5.20               | 0.54                 |
| Component | 1952_P002_pUTP | 10x3-Truncation        | 5036.790          | 5036.640              | 13.9                     | 5.039.93     | 2.12E+04      | 3.05               | 0.32                 |
| Component | P2_P002_pUTP   | 1xFe+                  | 7332.827          | 7332.922              | 12.9                     | 7.337.42     | 1.75E+04      | 2.52               | 0.26                 |

Capping efficiency

$$=(13.61+11.37+10.1+9.81+6.83)/(13.61+11.37+10.1+9.81+6.83+6.26+5.2+2.52)*100\%=79\%$$

## 11. LZCap AG (3'Ma-Cy5)

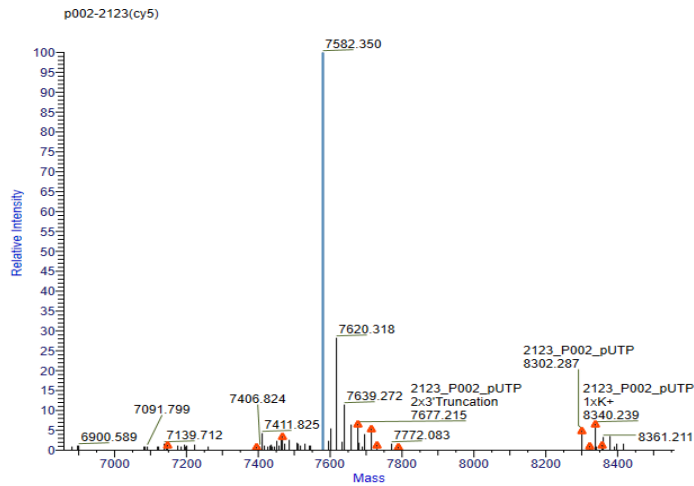

| #  | Level     | Sequence Name  | Modification             | Monoisotopic Mass | Theoretical Mass (Da) | Matched Mass Error (ppm) | Average Mass | Sum Intensity | Relative Abundance | Fractional Abundance |
|----|-----------|----------------|--------------------------|-------------------|-----------------------|--------------------------|--------------|---------------|--------------------|----------------------|
| 1  | Component | P3_P002_pUTP   | 1x3-Truncation, 1xFe+2   | 7149.721          | 7149.790              | 9.7                      | 7153.06      | 5.37E+04      | 1.55               | 0.51                 |
| 2  | Component | P3_P002_pUTP   | 1xK+                     | 7395.818          | 7395.917              | 13.4                     | 7399.27      | 3.67E+04      | 1.06               | 0.35                 |
| 3  | Component | P3_P002_pUTP   | 1xFe+2                   | 7469.762          | 7469.831              | 9.3                      | 7473.25      | 1.32E+05      | 3.81               | 1.25                 |
| 4  | Component | 2123_P002_pUTP | 2x3-Truncation           | 7677.215          | 7677.235              | 2.6                      | 7680.80      | 2.37E+05      | 6.82               | 2.23                 |
| 5  | Component | 2123_P002_pUTP | 2x3-Truncation, 1xK+     | 7715.158          | 7715.191              | 4.2                      | 7718.76      | 1.91E+05      | 5.52               | 1.80                 |
| 6  | Component | 2123_P002_pUTP | 2x3-Truncation, 1xFe+    | 7732.118          | 7732.162              | 5.7                      | 7735.73      | 5.67E+04      | 1.63               | 0.53                 |
| 7  | Component | 2123_P002_pUTP | 2x3-Truncation, 1xFe+2+H | 7790.066          | 7790.113              | 6.0                      | 7793.71      | 3.64E+04      | 1.05               | 0.34                 |
| 8  | Component | 2123_P002_pUTP |                          | 8302.287          | 8302.317              | 3.6                      | 8306.17      | 1.78E+05      | 5.14               | 1.68                 |
| 9  | Component | 2123_P002_pUTP | 1xNa+                    | 8324.263          | 8324.299              | 4.3                      | 8328.15      | 4.80E+04      | 1.38               | 0.45                 |
| 10 | Component | 2123_P002_pUTP | 1xK-                     | 8340.239          | 8340.273              | 4.1                      | 8344.14      | 2.37E+05      | 6.84               | 2.24                 |
| 11 | Component | 2123_P002_pUTP | 1xFe+                    | 8357.214          | 8357.244              | 3.7                      | 8361.12      | 5.38E+04      | 1.55               | 0.51                 |

Capping efficiency

$$= (2.23 + 1.8 + 0.34 + 1.68 + 0.45 + 2.24 + 0.51) / (2.23 + 1.8 + 0.34 + 1.68 + 0.45 + 2.24 + 0.51 + 0.51 + 0.35 + 1.25) * 100\% = 82\%$$

## 12. LZCap AG (3'Ma-FAM)

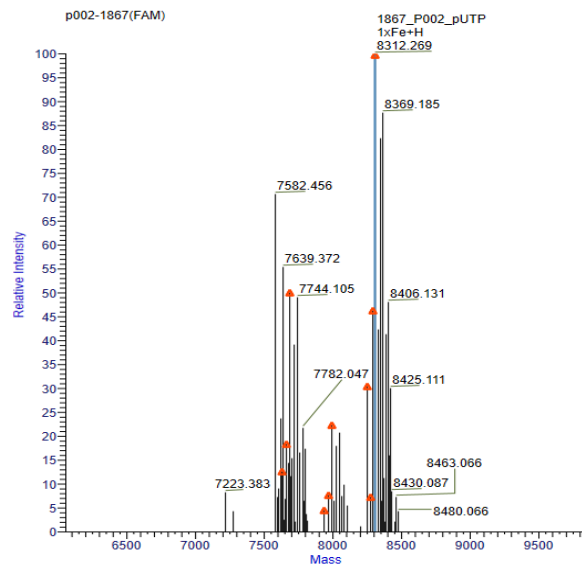

| #  | Level     | Sequence Name  | Modification           | Monoisotopic Mass | Theoretical Mass (Da) | Matched Mass Error (ppm) | Average Mass | Sum Intensity | Relative Abundance | Fractional Abundance |
|----|-----------|----------------|------------------------|-------------------|-----------------------|--------------------------|--------------|---------------|--------------------|----------------------|
| 1  | Component | 1867_P002_pUTP | 1xFe+H                 | 8312.269          | 8312.222              | 5.7                      | 8316.15      | 8.51E+05      | 100.00             | 8.10                 |
| 2  | Component | 1867_P002_pUTP | 2x3-Truncation, 1xFe+H | 7687.199          | 7687.140              | 7.7                      | 7690.79      | 4.27E+05      | 50.11              | 4.06                 |
| 3  | Component | 1867_P002_pUTP | 1xK+                   | 8293.296          | 8293.235              | 7.3                      | 8297.17      | 3.95E+05      | 46.39              | 3.76                 |
| 4  | Component | 1867_P002_pUTP |                        | 8255.342          | 8255.279              | 7.6                      | 8259.20      | 2.60E+05      | 30.52              | 2.47                 |
| 5  | Component | 1867_P002_pUTP | 1x3-Truncation, 1xFe+H | 7992.217          | 7992.181              | 4.5                      | 7995.95      | 1.91E+05      | 22.39              | 1.81                 |
| 6  | Component | 1867_P002_pUTP | 2x3-Truncation, 1xK+   | 7668.236          | 7668.153              | 10.8                     | 7671.82      | 1.58E+05      | 18.61              | 1.51                 |
| 7  | Component | 1867_P002_pUTP | 2x3-Truncation         | 7630.281          | 7630.197              | 11.0                     | 7633.84      | 1.09E+05      | 12.83              | 1.04                 |
| 8  | Component | 1867_P002_pUTP | 1x3-Truncation, 1xK-   | 7973.242          | 7973.194              | 6.0                      | 7976.97      | 6.60E+04      | 7.76               | 0.63                 |
| 9  | Component | 1867_P002_pUTP | 1xNa+                  | 8277.332          | 8277.261              | 8.5                      | 8281.20      | 6.27E+04      | 7.37               | 0.60                 |
| 10 | Component | 1867_P002_pUTP | 1x3-Truncation         | 7935.315          | 7935.238              | 9.7                      | 7939.02      | 3.90E+04      | 4.58               | 0.37                 |

Capping efficiency =

$$(8.1+4.06+3.16+2.47+1.81+1.51+1.04+0.63+0.6+0.37)/(8.1+4.06+3.16+2.47+1.81+1.51+1.04+0.63+0.6+0.37)*100\%=100\%$$

### 13. LZCap AG (3'Ma-FAM)

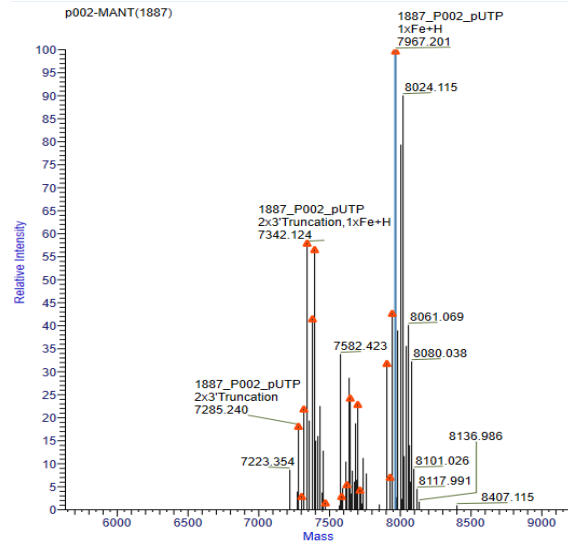

| Level | Sequence Name  | Modification                          | Monoisotopic Mass | Theoretical Mass (Da) | Matched Mass Error (ppm) | Average Mass | Sum Intensity | Relative Abundance | Fractional Abundance |
|-------|----------------|---------------------------------------|-------------------|-----------------------|--------------------------|--------------|---------------|--------------------|----------------------|
| 1     | 1887_P002_pUTP | 1xFe+H                                | 7967.201          | 7967.182              | 2.2                      | 7370.92      | 3.12e+05      | 100.00             | 8.87                 |
| 2     | 1887_P002_pUTP | 2x3 Truncation, 1xFe+H                | 7342.124          | 7342.103              | 2.8                      | 7345.55      | 3.94e+05      | 58.09              | 5.16                 |
| 3     | 1887_P002_pUTP | 2x3 Truncation, 1xFe <sup>2+</sup> +H | 7398.032          | 7398.038              | 0.7                      | 7401.49      | 3.85e+05      | 56.71              | 5.03                 |
| 4     | 1887_P002_pUTP | 1xFe                                  | 7946.222          | 7946.198              | 2.2                      | 7351.84      | 2.99e+05      | 42.75              | 2.90                 |
| 5     | 1887_P002_pUTP | 1xFe+                                 | 7380.062          | 7379.943              | 16.2                     | 7383.51      | 2.82e+05      | 41.60              | 3.69                 |
| 6     | 1887_P002_pUTP | 2x3 Truncation, 1xFe+H                | 7910.276          | 7910.242              | 4.3                      | 7913.97      | 2.18e+05      | 32.68              | 2.83                 |
| 7     | 1887_P002_pUTP | 1x3 Truncation, 1xFe <sup>2+</sup> +H | 7847.933          | 7847.144              | 7.7                      | 7850.77      | 1.66e+05      | 24.84              | 2.18                 |
| 8     | 1887_P002_pUTP | 1x3 Truncation, 1xFe+H                | 7703.098          | 7703.079              | 2.4                      | 7706.70      | 1.56e+05      | 23.02              | 2.04                 |
| 9     | 1887_P002_pUTP | 2x3 Truncation, 1xFe                  | 7323.169          | 7323.116              | 5.3                      | 7326.59      | 1.50e+05      | 22.10              | 1.96                 |
| 10    | 1887_P002_pUTP | 2x3 Truncation                        | 7285.240          | 7285.190              | 5.0                      | 7288.64      | 1.34e+05      | 19.33              | 1.81                 |
| 11    | 1887_P002_pUTP | 1xFe+                                 | 7932.231          | 7932.224              | 3.4                      | 7935.98      | 4.89e+04      | 7.21               | 0.84                 |
| 12    | 1887_P002_pUTP | 1x3 Truncation, 1xFe                  | 7628.209          | 7628.157              | 6.8                      | 7631.77      | 2.81e+04      | 5.42               | 0.50                 |
| 13    | 1887_P002_pUTP | 1x3 Truncation, 1xOEtEt               | 7719.317          | 7719.353              | 4.6                      | 7722.82      | 2.97e+04      | 4.38               | 0.39                 |
| 14    | 1887_P002_pUTP | 2x3 Truncation, 1xFe+                 | 7307.182          | 7307.142              | 5.8                      | 7310.60      | 2.12e+04      | 3.13               | 0.28                 |
| 15    | 1887_P002_pUTP | 1x3 Truncation                        | 7590.201          | 7590.201              | 3.8                      | 7593.77      | 2.07e+04      | 3.05               | 0.27                 |
| 16    | 1887_P002_pUTP | 1xFe <sup>2+</sup> +H                 | 7470.943          | 7470.839              | 14.0                     | 7474.43      | 1.10e+04      | 1.62               | 0.14                 |

Capping efficiency

$$=(8.87+5.16+5.03+3.8+2.85+2.18+2.04+1.96+1.63+0.64+0.5+0.39+0.28+0.2)/(8.87+5.16+5.03+3.8+2.85+2.18+2.04+1.96+1.63+0.64+0.5+0.39+0.28+0.27+3.69+0.14)*100\%=90\%$$

### S11. Transcript length, and template details of luciferase mRNA,

### eGFP mRNA and HB<sub>s183</sub>-TCR mRNA

#### Luciferase mRNA (1974nt)

AGGAGACCCAAGCTGGCTAGCTTAAGCTTCTTGTTCTTTTTGCAGAAGCT  
 CAGAATAAACGCTCAACTTTGGCCTGCAGGGCCACCATGGAAGACGCCA  
 AAAACATAAAGAAAGGCCCGGCCATTCTATCCGCTAGAGGATGGAACC  
 GCTGGAGAGCAACTGCATAAGGCTATGAAGAGATACGCCCTGGTTCTTG  
 GAACAATTGCTTTTACAGATGCACATATCGAGGTGAACATCACGTACGCG

GAATACTTCGAAATGTCCGTTCCGGTTGGCAGAAGCTATGAAACGATATGG  
GCTGAATACAAATCACAGAATCGTCGTATGCAGTGAAAACCTCTTTCAATT  
CTTTATGCCGGTGTGGGGCGCGTTATTTATCGGAGTTGCAGTTGCGCCCG  
CGAACGACATTTATAATGAACGTGAATTGCTCAACAGTATGAACATTTTCGC  
AGCCTACCGTAGTGTTTGTTCCTCAAAAAGGGGTTGCAAAAATTTTGAAC  
GTGCAAAAAAATTACCAATAATCCAGAAAATTATTATCATGGATTCTAAAAC  
GGATTACCAGGGATTTAGTTCGATGTACACGTTTCGTACATCTCATCTACC  
TCCCGGTTTTAATGAATACGATTTTGTACCAGAGTCCTTTGATCGTGACAA  
ACAATTGCACTGATAATGAACTCCTCTGGATCTACTGGGTTACCTAAGGG  
TGTGGCCCTTCCGCATAGAAGTGCCTGCGTCAGATTCTCGCATGCCAGA  
GATCCTATTTTTGGCAATCAAATCATTCCGGATACTGCGATTTTAAGTGTTG  
TTCCATTCCATCACGGTTTTGGAATGTTTACTACACTCGGATATTTGATATG  
TGGATTTTCGAGTCGTCTTAATGTATAGATTTGAAGAAGAGCTGTTTTTACG  
ATCCCTTCAGGATTACAAAATTCAAAGTGCCTTGCTAGTACCAACCCTATT  
TTCATTCTTCGCCAAAAGCACTCTGATTGACAAATACGATTTATCTAATTTA  
CACGAAATTGCTTCTGGGGGCGCACCTCTTTCGAAAGAAGTCGGGGGAAG  
CGGTTGCAAAACGCTTCCATCTTCCAGGGATACGACAAGGATATGGGCTC  
ACTGAGACTACATCAGCTATTCTGATTACACCCGAGGGGGATGATAAACC  
GGGCGCGGTTCGGTAAAGTTGTTCCATTTTTTGAAGCGAAGGTTGTGGAT  
CTGGATACCGGGAAAACGCTGGGCGTTAATCAGAGAGGCGAATTATGTGT  
CAGAGGACCTATGATTATGTCCGGTTATGTAAACAATCCGGAAGCGACCA  
ACGCCTTGATTGACAAGGATGGATGGCTACATTCTGGAGACATAGCTTAC  
TGGGACGAAGACGAACACTTCTTCATAGTTGACCGCTTGAAGTCTTTAATT  
AAATACAAAGGATACCAGGTGGCCCCCGCTGAATTGGAGTCGATATTGTT  
ACAACACCCCAACATCTTCGACGCGGGCGTGGCAGGTCTTCCCGACGAT  
GACGCCGGTGAACCTTCCCGCCGCGGTTGTTGTTTTGGAGCACGGAAAGA  
CGATGACGGAAAAAGAGATCGTGGATTACGTCGCCAGTCAAGTAACAACC  
GCGAAAAAGTTGCGCGGAGGAGTTGTGTTTGTGGACGAAGTACCGAAAG  
GTCTTACCGGAAAACCTCGACGCAAGAAAAATCAGAGAGATCCTCATAAAG  
GCCAAGAAGGGCGGAAAGTCCAAATTGTAAGTCGACACCAGCCTCAAGA  
ACACCCGAATGGAGTCTCTAAGCTACATAATACCAACTTACACTTTACAAA  
ATGTTGTCCCCCAAATGTAGCCATTCGTATCTGCTCCTAATAAAAAGAAA  
GTTTCTTCACATTCAAAAA  
AAAAAAAAAAAAAAAAAAAAAAAAAAAAAAAAAAAAAAAAAAAAAAAAAAAA  
AAAAAAAAAAAAAAAAAAAAAAAAAAAAAAAAAAAAAAAAAAAAAAAAAAAA  
AAAAAAAAAAAA

**eGFP mRNA (1210nt)**

AGGAGACCCAAGCTGGCTAGCGTTTAACTTAAGCTTCTTGTTCTTTTTG  
CAGAAGCTCAGAATAAACGCTCAACTTTGGCCTGCAGGGCCACCATGGT  
GAGCAAGGGCGAGGAGCTGTTACCGGGGTGGTGCCCATCCTGGTCGA  
GCTGGACGGCGACGTAAACGGCCACAAGTTCAGCGTGTCCGGCGAGGG  
CGAGGGCGATGCCACCTACGGCAAGCTGACCCTGAAGTTCATCTGCACC  
ACCGGCAAGCTGCCCGTGCCCTGGCCCACCCTCGTGACCACCCTGACC  
TACGGCGTGCAGTGCTTCAGCCGCTACCCCGACCACATGAAGCAGCAGC

ACTTCTTCAAGTCCGCCATGCCCGAAGGCTACGTCCAGGAGCGCACCAT  
CTTCTTCAAGGACGACGGCAACTACAAGACCCGCGCCGAGGTGAAGTTC  
GAGGGCGACACCCTGGTGAACCGCATCGAGCTGAAGGGCATCGACTTC  
AAGGAGGACGGCAACATCCTGGGGCACAAGCTGGAGTACAACTACAACA  
GCCACAACGTCTATATCATGGCCGACAAGCAGAAGAACGGCATCAAGGT  
GAACTTCAAGATCCGCCACAACATCGAGGACGGCAGCGTGCAGCTCGCC  
GACCACTACCAGCAGAACACCCCCATCGGGCGACGGCCCCGTGCTGCTG  
CCCGACAACCACTACCTGAGCACCCAGTCCGCCCTGAGCAAAGACCCCA  
ACGAGAAGCGCGATCACATGGTCCTGCTGGAGTTCGTGACCGCCGCCG  
GGATCACTCTCGGCATGGACGAGCTGTACAAGTAGCAAGTAACAACCGC  
GAAAAAGTTGCGCGGAGGAGTTGTGTTTGTGGACGAAGTACCGAAAGGT  
CTTACCGGAAAACCTCGACGCAAGAAAAATCAGAGAGATCCTCATAAAGGC  
CAAGAAGGGCGGAAAGTCCAAATTGTAAGTCGACACCAGCCTCAAGAAC  
ACCCGAATGGAGTCTCTAAGCTACATAATACCAACTTACACTTTACAAAATG  
TTGTCCCCCAAATGTAGCCATTCGTATCTGCTCCTAATAAAAAGAAAGTT  
TCTTCACATTCAAAAAAAAAAAAAAAAAAAAAAAAAAAAAAAAAAAAAAAAA  
AAAAAAAAAAAAAAAAAAAAAAAAAAAAAAAAAAAAAAAAAAAAAAAAAAAA  
AAAAAAAAAAAAAAAAAAAAAAAAAAAAAAAAAAAAAAAAAAAAAAAAAAAA

**HBs<sub>183</sub>-TCR mRNA (2120nt)**

AGACATTTGCTTCTGACACAACCTGTGTTCACTAGCAACCTCAAACAGACA  
CCATGCTGCTCGCTCTGCTGCCTGTGCTGGGCATCCACTTCCCTGCTGAG  
AGATGCCCAAGCCCAGAGCGTCACCCAGCCTGACGCTAGAGTGACCGT  
GTCCGAGGGCGCTAGCCTGCAGCTGAGATGTAAATACAGCTACTTCGGC  
ACACCTTACCTGTTCTGGTATGTGCAATACCCTAGACAGGGCCTGCAGCT  
GCTGCTGAAGTACTACCCGGGAGATCCTGTGGTGCAAGGCGTGAACGG  
CTTCGAGGCCGAATTCTCTAAGAGCAACAGCAGCTTCCATCTGCGGAAG  
GCCAGCGTGCACTGGTCAGATTGGGCCGTGACTTTTGCGCCGTGACAA  
GTTACGACACCAACGCCTACAAGGTGATCTTTGGAAAGGGCACCCACCT  
GCACGTGCTGCCAACATCCAGAATCCCGAGCCCGCCGTTTACCAGCTC  
AAGGACCCTAGATCCCAGGACAGCACACTCTGCCTGTTACCGACTTCG  
ACTCTCAGATCAACGTGCCAAGACCATGGAATCTGGCACATTCATCACC  
GATAAGTGCGTGCTGGACATGAAGGCCATGGACTCCAAGAGCAATGGCG  
CTATCGCCTGGTCCAACCAGACCAGCTTCACCTGTCAGGATATCTTCAAG  
GAAACCAACGCCACCTACCCTAGCAGCGACGTGCCTTGCGACGCCACCC  
TGACCGAGAAGTCTTTCGAGACAGATATGAACCTGAACTTTCAGAACCTG  
CTGGTCATCGTGCTCAGAATCCTGTTACTTAAGGTGGCCGGATTTAACCT  
GCTGATGACCCTGCGGCTGTGGAGCTCCCGGGCGAAGAGATCCGGCTC  
TGGAGCAACAACTTCAGCCTGCTTAAACAGGCCGGCGACGTGGAAGAG  
AACCCTGGCCCCATGAGCAATACCGTTCTGGCCGACTCTGCCTGGGGAA  
TTACACTGCTGAGCTGGGTGACAGTGTTCTGCTGGGCACATCTAGCGC  
CGACAGCGGAGTGGTGACGTCTCCAAGACACATCATCAAGGAAAAAGGC  
GGCCGGTCTGTGCTTACATGTATCCCATCAGCGGCCACAGCAATGTGG

TGTGGTACCAGCAGACCCTGGGCAAGGAGCTGAAGTTCCTGATCCAACA  
 CTACGAGAAGGTTCGAGCGGGACAAGGGCTTTCTGCCAAGCCGGTTCAG  
 CGTGCAGCAATTTGACGACTACCACTCTGAGATGAACATGTCCGCCCTGG  
 AACTGGAAGATAGCGCCATGTACTTCTGTGCCAGCAGCCTGGCTCAGGG  
 AGCTGATGAGCAGTACTTCGGCCCTGGCACCAGACTGACCGTGCTGGAG  
 GATCTGAGGAATGTGACCCACCTAAGGTGAGCCTCTTCGAGCCTTCTAA  
 GGCCGAGATTGCCAACAAGCAGAAGGCCACCCTGGTGTGCCTGGCCAG  
 AGGCTTCTTCCCTGACCACGTAGAACTGAGCTGGTGGGTCAACGGAAAG  
 GAAGTGCATAGCGGCGTGTGCACCGACCCCCAGGCCTATAAAGAGTCTA  
 ATTACAGCTACTGCCTGAGCAGCAGACTGAGAGTATCAGCTACCTTCTGG  
 CACAACCCTCGGAACCACTTCAGATGCCAGGTGCAGTTCCACGGCCTGA  
 GCGAGGAAGATAAATGGCCTGAGGGCAGCCCTAAACCCGTGACCCAGAA  
 CATCTCTGCTGAAGCCTGGGGCCGTGCCGACTGCGGCATCACCAGCGC  
 CTCCTATCAGCAGGGCGTGTGAGCGCCACAATCCTGTACGAGATCCTG  
 CTGGGTAAGGCCACACTGTACGCCGTGCTGGTGTCCACCCTGGTCGTGA  
 TGGCCATGGTGAAAAGAAAGAACTCTTGATAATAGGCTGGAGCCTCGGTG  
 GCCATGCTTCTTGCCCTTGGGCCTCCCCCAGCCCCTCCTCCCCTTCC  
 TGCACCCGTACCCCGTGGTCTTTGAATAAAGTCTGAAAAAAAAAAAAAA  
 AAAAAAAAAAAAAAAAAAAAAAAAAAAAAAAAAAAAAAAAAAAAAAAAAAAAAA  
 AAAAAAAAAAAAAAAAAAAAAAAAAAAAAAAAAAAAAAAAAAAAAAAAAAAAAA  
 AAAAA

**S12 .Characterization of LNP samples.**

| Sample               | Encapsulation % | Size (nm) | PDI     | Experiment                                                                            |
|----------------------|-----------------|-----------|---------|---------------------------------------------------------------------------------------|
| Cy5-TCR              | 97.02%          | 95.5      | 0.01809 | Detection of mRNA in Jurkat T cells                                                   |
| Anti CD3-LNP-Cy5 TCR | 92.53%          | 183.7     | 0.0619  | Detection of mRNA in Jurkat T cells                                                   |
| Anti CD7-LNP-Cy5-TCR | 93.15%          | 120.6     | 0.069   | Detection of mRNA in Jurkat T cells                                                   |
| Cy5-eGFP-LNP         | 98.38%          | 108.3     | 0.1334  | Intracellular localization of mRNA in Huh7 cells                                      |
| Cy5-Luciferase-LNP   | 98.98%          | 108.1     | 0.04396 | Intracellular localization of mRNA in Huh7 cells/<br>In vivo immaging of mRNA in mice |
| Cy7-Luciferase-LNP   | 97.46%          | 104.8     | 0.1167  | In vivo immaging of mRNA in mice                                                      |
